# Supplementary material for: The transcriptome of corona radiata cells from individual MІІ oocytes that after ICSI developed to embryos selected for transfer: PCOS women compared to healthy women
Source: Springer Nature journal article supplement (doi:10.1186/s13048-014-0110-6), 2014-11-28
Supplement: MOESM4 [file 9778508]

**Table I.** Baseline descriptive parameters of the study participants and the average developmental timings of the embryos corresponding to the CRC samples used in the study.

|                                          | <b>PCOS</b>            | <b>Controls</b>     | <b>p-value</b>    |
|------------------------------------------|------------------------|---------------------|-------------------|
| <b>Age</b>                               | <b>27,3±3,4</b>        | <b>27,8±4</b>       | <b>ns</b>         |
| <b>BMI</b>                               | <b>24±4,8</b>          | <b>22,4±3,5</b>     | <b>ns</b>         |
| <b>No of antral follicles/ one plane</b> | <b>15,8±5,4</b>        | <b>8,2±1,7</b>      | <b>&lt;0,0001</b> |
| <b>No of menstrual bleedings/ year</b>   | <b>1,8±3,2</b>         | <b>12±0</b>         | <b>&lt;0,0001</b> |
| <b>Total testosterone</b>                | <b>2,8±1,1</b>         | <b>1,2±0,3</b>      | <b>0,0003</b>     |
| <b>Free testosterone</b>                 | <b>0,03931±0,02532</b> | <b>0,014±0,0042</b> | <b>0,0029</b>     |
| <b>SHBG</b>                              | <b>78±26</b>           | <b>79±21</b>        | <b>ns</b>         |
| <b>LH/FSH</b>                            | <b>1,6±0,8</b>         | <b>0,8±0,3</b>      | <b>0,03</b>       |
| <b>Time of 2PN breakdown (h)</b>         | <b>23.2±3.8</b>        | <b>21.8±2.4</b>     | <b>ns</b>         |
| <b>Time of 1st Cleavage (h)</b>          | <b>26±4.1</b>          | <b>24.3±2.5</b>     | <b>ns</b>         |
| <b>Time of cleavage to 4 cells (h)</b>   | <b>38.3±5</b>          | <b>36.4±4.2</b>     | <b>ns</b>         |

p-value <0,05 considered significant. Not significant=ns
