# Supplementary material for: The transcriptome of corona radiata cells from individual MІІ oocytes that after ICSI developed to embryos selected for transfer: PCOS women compared to healthy women
Source: Springer Nature journal article supplement (doi:10.1186/s13048-014-0110-6), 2014-11-28
Supplement: MOESM5 [file 9778508]

**Table II.** Gene Set Enrichment Analysis of the transcriptome of CRCs of individual oocytes developing into embryos selected for transfer. PCOS women compared controls (n=6 PCOS arrays vs n=6 control arrays). Enriched pathways with FDR <0.05 were listed. NES=normalized enrichment score. All enriched pathways were upregulated in PCOS CRC samples.

| <b>Pathway</b>                                                                   | <b>No of genes enriched/ total number of genes in the pathway</b> | <b>FDR</b> | <b>NES</b> |
|----------------------------------------------------------------------------------|-------------------------------------------------------------------|------------|------------|
| <b>Reactome Cell Cycle</b>                                                       | 127/421                                                           | 0.001      | 0.42       |
| <b>Reactome G2 M Checkpoints</b>                                                 | 17/45                                                             | 0.001      | 0.61       |
| <b>KEGG DNA Replication</b>                                                      | 20/36                                                             | 0.001      | 0.65       |
| <b>Reactome Meiotic Recombination</b>                                            | 35/86                                                             | 0.001      | 0.59       |
| <b>Reactome Packaging of Telomere Ends</b>                                       | 25/48                                                             | 0.001      | 0.63       |
| <b>Reactome Activation of the Pre Replicative Complex</b>                        | 14/31                                                             | 0.001      | 0.60       |
| <b>Reactome RNA POL I RNA POL III and Mitochondrial Transcription</b>            | 45/122                                                            | 0.001      | 0.53       |
| <b>Reactome RNA POL I Transcription</b>                                          | 35/89                                                             | 0.001      | 0.55       |
| <b>Reactome RNA POL I Promotor Opening</b>                                       | 32/62                                                             | 0.001      | 0.64       |
| <b>Reactome Activation of ATR in Response to Replication Stress</b>              | 15/38                                                             | 0.001      | 0.63       |
| <b>Reactome Deposition of new CENPA containing Nucleosomes at the Centromere</b> | 34/64                                                             | 0.001      | 0.60       |
| <b>Reactome DNA strand Elongation</b>                                            | 20/30                                                             | 0.001      | 0.69       |
| <b>Reactome Telomere Maintenance</b>                                             | 39/75                                                             | 0.001      | 0.61       |
| <b>Reactome Cell Cycle Mitotic</b>                                               | 94/325                                                            | 0.01       | 0.41       |
| <b>Reactome Meiosis</b>                                                          | 45/116                                                            | 0.01       | 0.49       |
| <b>Reactome Amyloids</b>                                                         | 34/83                                                             | 0.01       | 0.51       |
| <b>Reactome lagging strand synthesis</b>                                         | 12/19                                                             | 0.01       | 0.69       |
| <b>Reactome Mitotic M M G1 Phases</b>                                            | 55/137                                                            | 0.03       | 0.42       |
| <b>Reactome Mitotic Prometaphase</b>                                             | 32/87                                                             | 0.03       | 0.47       |
| <b>Reactome DNA replication</b>                                                  | 56/192                                                            | 0.03       | 0.42       |
| <b>Reactome Meiotic Synapsis</b>                                                 | 34/73                                                             | 0.03       | 0.50       |
| <b>Reactome Chromosome Maintenance</b>                                           | 55/122                                                            | 0.03       | 0.42       |
| <b>Reactome Extension of Telomeres</b>                                           | 13/27                                                             | 0.03       | 0.59       |
| <b>Reactome Transcription</b>                                                    | 61/210                                                            | 0.04       | 0.41       |
